# Supplementary material for: Comprehensive landscape of epigenetic-dysregulated lncRNAs reveals a profound role of enhancers in carcinogenesis in BC subtypes
Source: PubMed Central journal article supplement — Mol Ther Nucleic Acids. 2021 Jan 1;23:667–81. doi: 10.1016/j.omtn.2020.12.024 (PMC7851425; doi:10.1016/j.omtn.2020.12.024), 2021-01-01
Supplement: mmc1.pdf [file mmc1.pdf]

OMTN, Volume 23

## Supplemental Information

**Comprehensive landscape of epigenetic-  
dysregulated lncRNAs reveals a profound role  
of enhancers in carcinogenesis in BC subtypes**

**Hongying Zhao, Xiaoqin Liu, Lei Yu, Shihua Lin, Caiyu Zhang, Haotian Xu, Zhijun Leng, Waidong Huang, Junjie Lei, Tengyue Li, Jing Li, Fan Yang, and Li Wang**

**Table S1. The forward and reverse primers used for quantitative reverse transcription-polymerase chain reaction**

| Target genes   |         | Primer sequences                |
|----------------|---------|---------------------------------|
| RP1-140K8.5    | Forward | 5'-ACCTTGGCTGAGTCTTGACA-3'      |
|                | Reverse | 5'-CAATTCCCACCAGCACGAAC-3'      |
| KB-1836B5.1    | Forward | 5'-GAGGACCCCAGGTGTGTTTT-3'      |
|                | Reverse | 5'-GGACCACAACAGTCTCGCTT-3'      |
| CASC11         | Forward | 5'-GGCCTGTCAAGAGATGAGGT-3'      |
|                | Reverse | 5'-TCGTTGGAACACATGCTTGG-3'      |
| LINC00393      | Forward | 5'-CGTTGTTACGACAGCACAGA-3'      |
|                | Reverse | 5'-TCACTGCAGTTGACCTCCAA-3'      |
| AC005162.1     | Forward | 5'-CTTTCTCTTCTGACTGTCCAGTGAG-3' |
|                | Reverse | 5'-GTTCCCTTAAATTAGCTCCTCTGTC-3' |
| AC020916.2     | Forward | 5'-ATCCGTCCAGGCCGACTTCCTAACT-3' |
|                | Reverse | 5'-TGCACCTAGAAGCTCTCTTCTGTGG-3' |
| $\beta$ -actin | Forward | 5'-ATCGTCCACCGCAAATGCTTCTA-3'   |
|                | Reverse | 5'-AGCCATGCCAATCTCATCTTGTT-3'   |

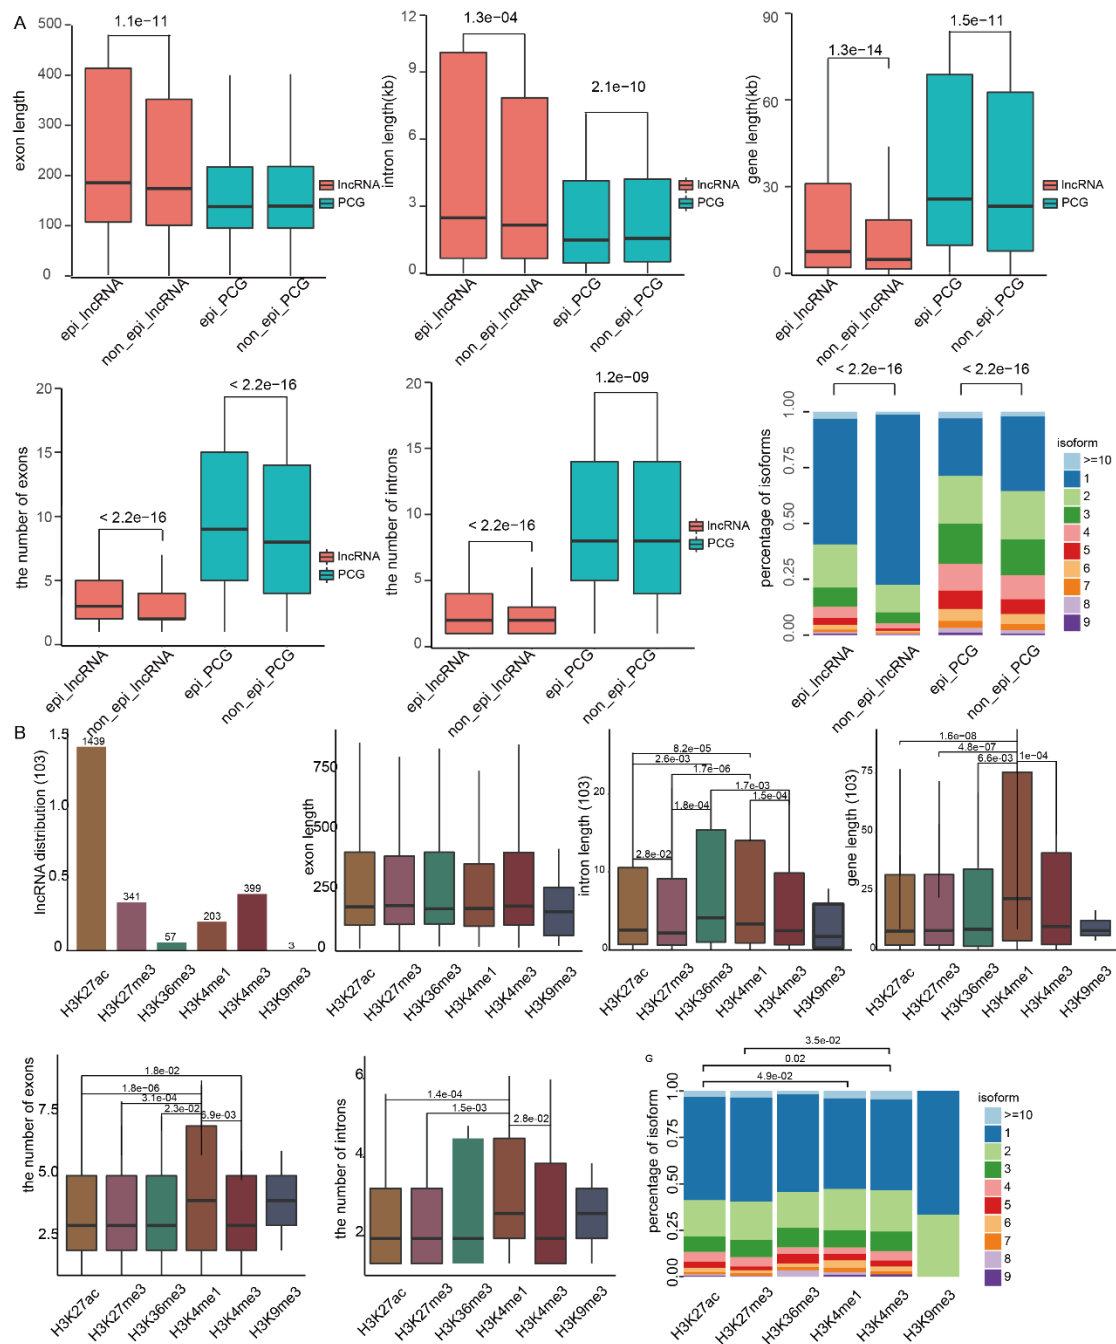

**Figure S1. Genomic signatures of epigenetically dysregulated lncRNAs.** (A) The comparison of epi-lncRNAs with non-epi-lncRNAs (epi-PCGs with non-epi-PCGs) and (B) comparison among lncRNAs with different aberrant epigenetic modifications in exon length, intron length, overall gene length, exon number, intron number and isoform number. *P* values were calculated by wilcoxon rank sum test.

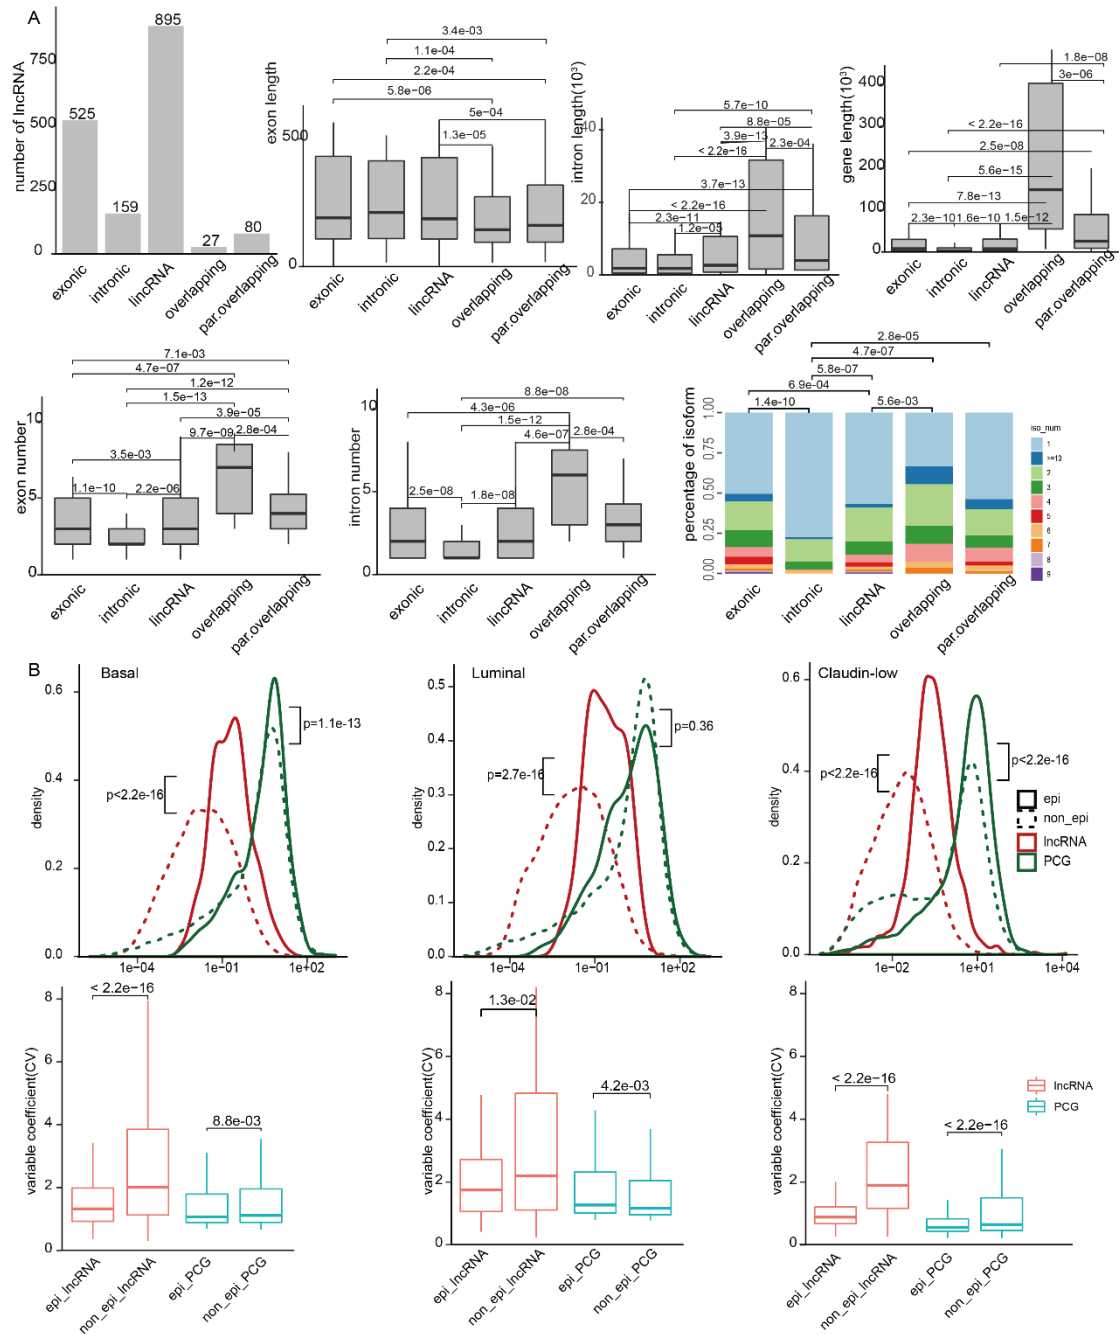

**Figure S2. Genomic signatures of epigenetically dysregulated lncRNAs.** (A) The comparison of epi-lncRNAs with non-epi-lncRNAs according to five categories in exon length, intron length, overall gene length, exon number, intron number and isoform number. (B) Expression characteristics of epi-lncRNAs. Comparison of average expression and coefficient of variation between epi-lncRNAs with non-epi-lncRNAs (epi-PCGs with non-epi-PCGs) in basal, luminal and claudin-low subtypes. *P* values were calculated by wilcoxon rank sum test.

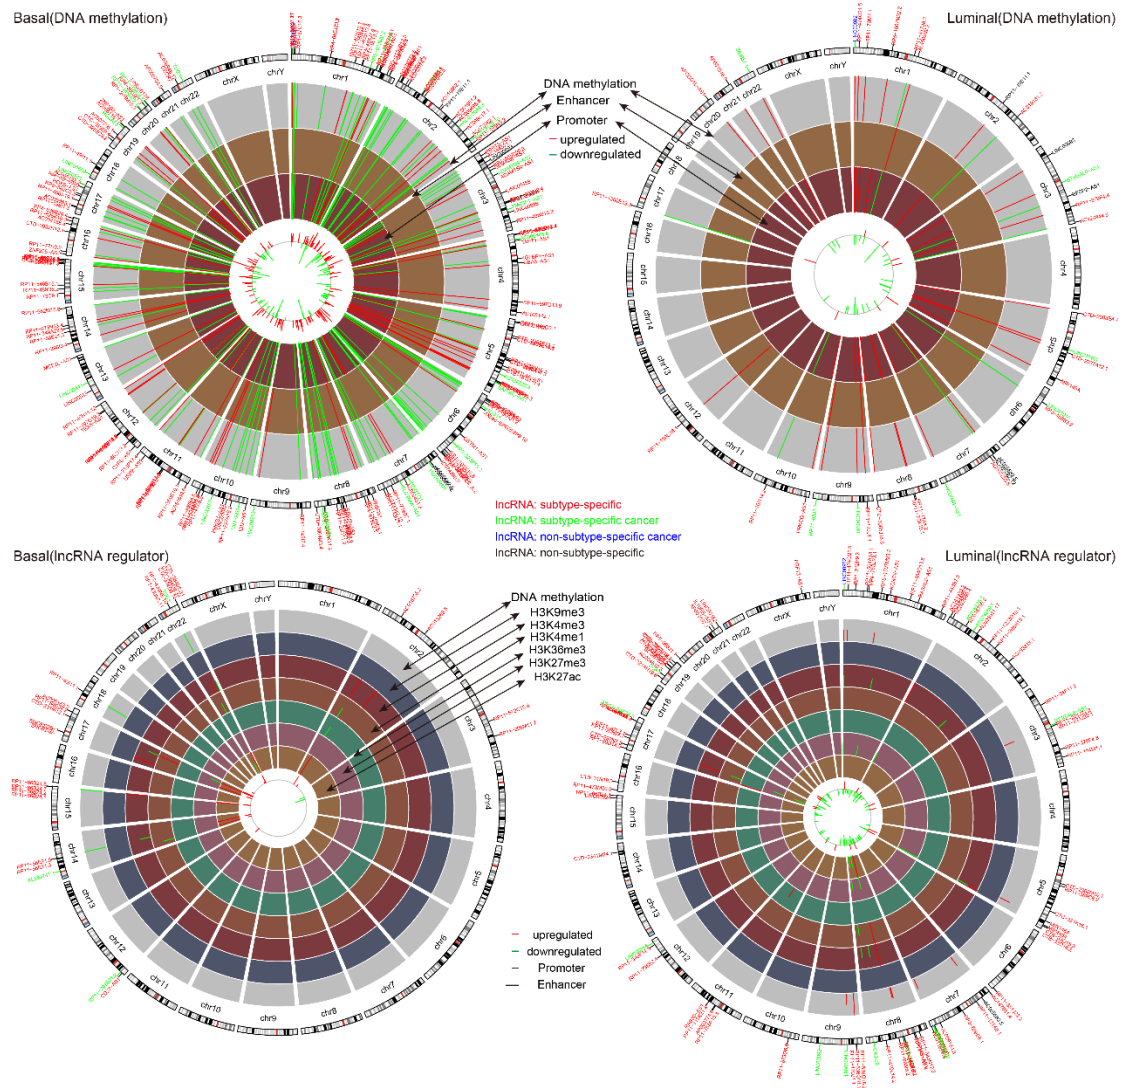

**Figure S3. Landscape of DNA methylation-dysregulated lncRNAs and lncRNA regulators in basal subtype and luminal subtype.**

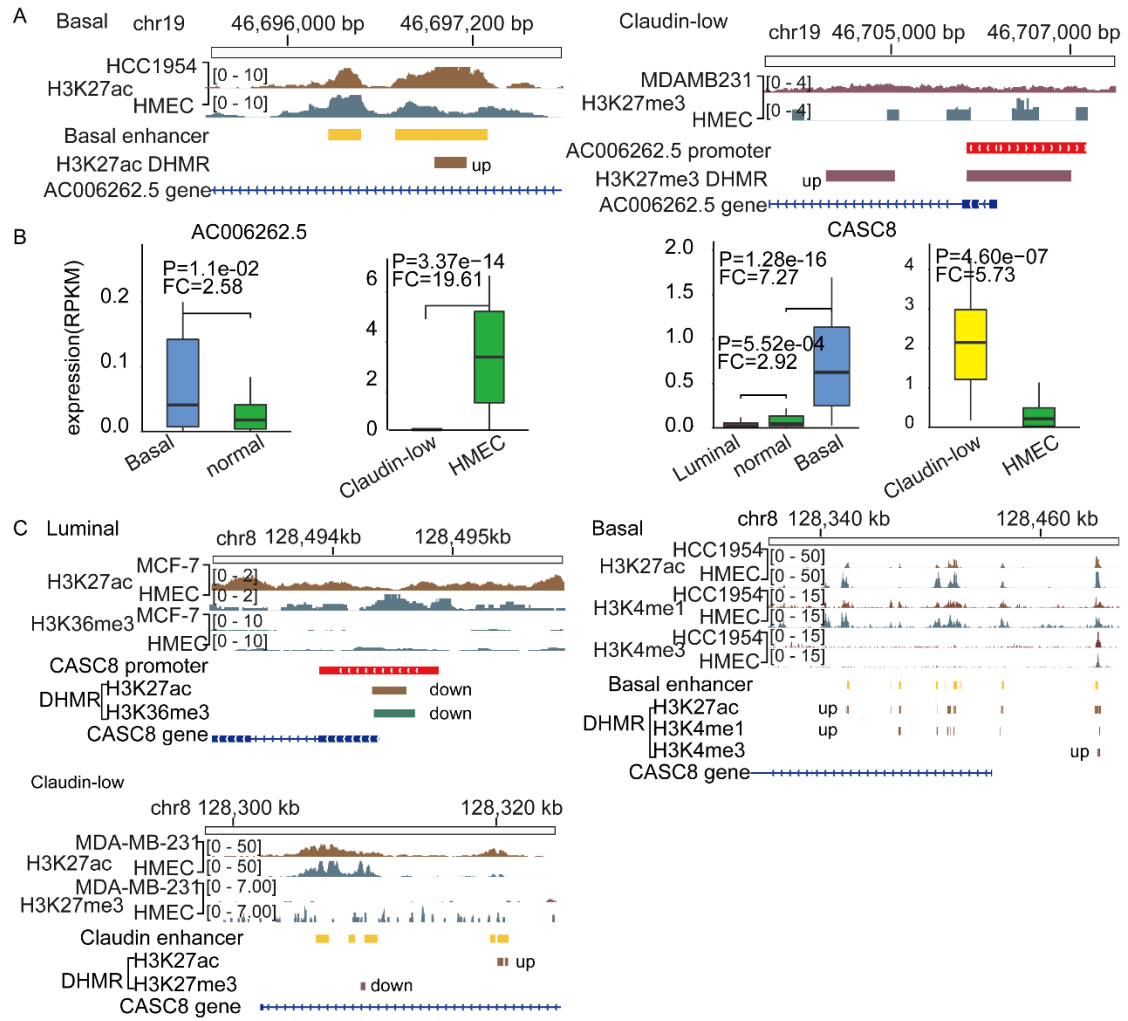

**Figure S4. Examples of common epi-lncRNAs in different breast cancer subtypes.**

(A) Histone modification profile of AC006262.5 shared by basal and claudin-low subtypes. (B) Histone modification profile of CASC8 shared by luminal, basal and claudin-low subtypes. (C) Expression distribution of AC006262.5 and CASC8 in breast cancer and control samples.

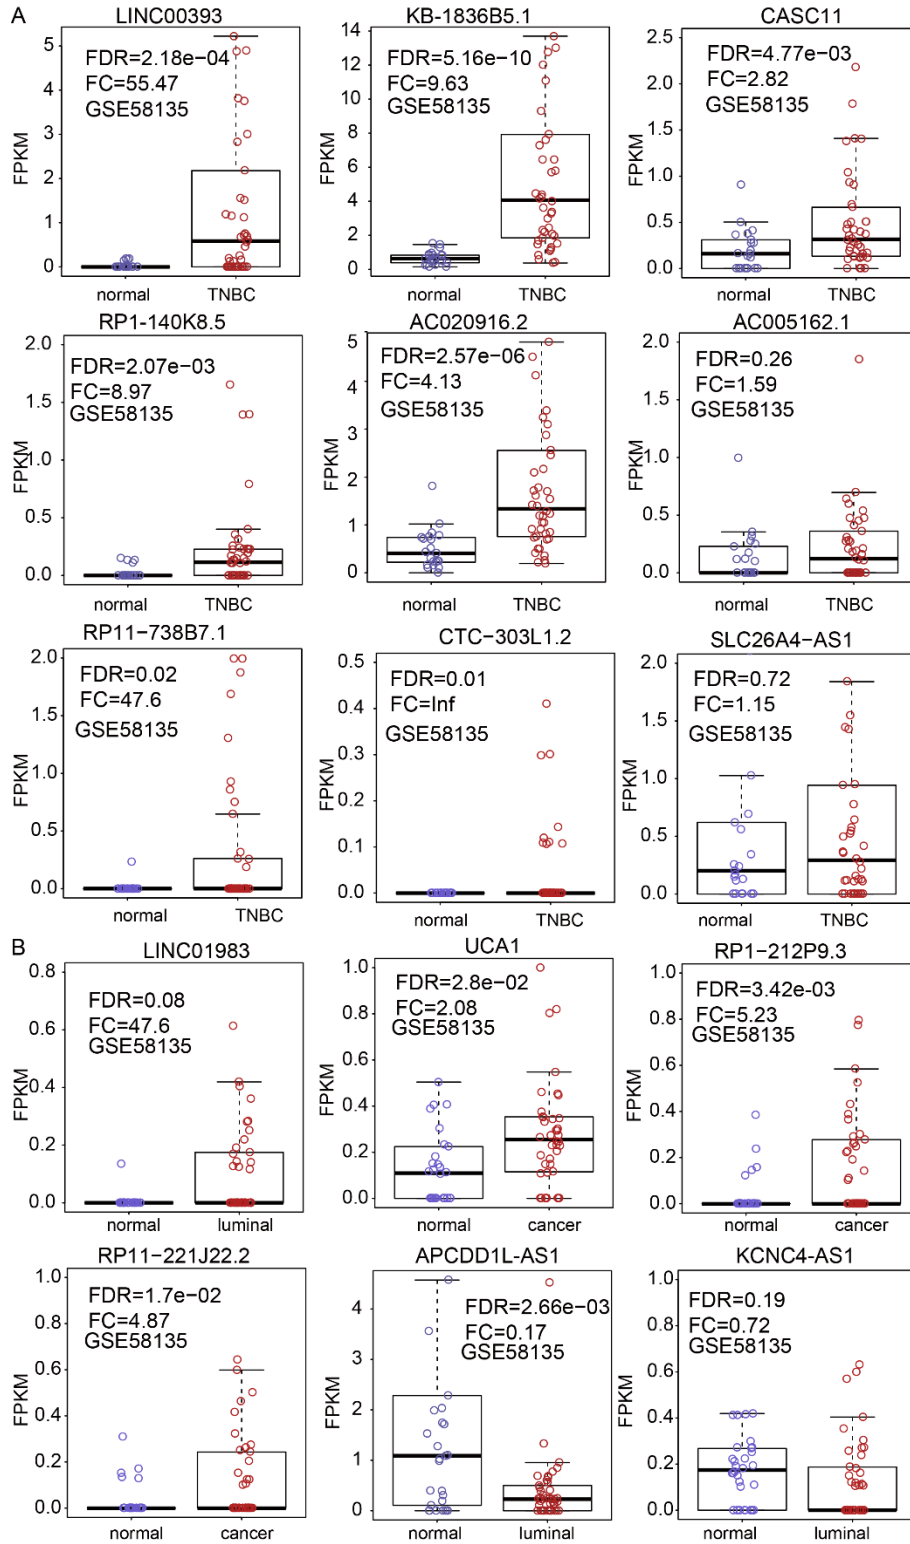

**Figure S5.** Confirmation of the differential expression of selected lncRNAs in the basal (A) and luminal (B) subtypes of breast cancer.
